# Supplementary material
Source: PubMed Central journal article supplement (PMC5573241)
Supplement: NIHMS874252-supplement-Supplemental_Tables.pdf [file NIHMS874252-supplement-Supplemental_Tables.pdf]

Supplemental Material

Supplemental Table 1. *Characteristics of Self-Report Questionnaires and Behavioral Task Assessing Impulsivity-Related Traits and Risk-taking Behaviors.*

|                           | <b>Citation</b>                    | <b>Number of Items</b> | <b>Example Item</b>                                                      | <b>Cronbach's Alpha</b> |
|---------------------------|------------------------------------|------------------------|--------------------------------------------------------------------------|-------------------------|
| <b><u>UPPS</u></b>        |                                    |                        |                                                                          |                         |
| Urgency                   |                                    |                        | “I have trouble controlling my impulses”                                 | 0.84                    |
| (Lack of) Premeditation   | Whiteside & Lynam, 2001            | 33                     | “My thinking is usually careful and purposeful”                          | 0.85                    |
| (Lack of) Perseverance    |                                    |                        | “I generally like to see things through to the end”                      | 0.84                    |
| <b><u>BSSS</u></b>        | Hoyle et al., 2002                 | 8                      | “I would like to explore strange places”                                 | 0.84                    |
| <b><u>BAS</u></b>         |                                    |                        |                                                                          |                         |
| Reward Response Drive     | Carver & White, 1994               | 13                     | “When I get something I want, I feel excited and energized”              | 0.74                    |
| Fun Seeking               |                                    |                        | “When I go after something, I use a ‘no holds barred’ approach”          | 0.75                    |
|                           |                                    |                        | “I will often do things for no other reason than that they might be fun” | 0.70                    |
| <b><u>Discounting</u></b> | Kirby et al., 1999                 | 27                     | “\$54 now or \$75, 117 days from now”                                    | 0.93                    |
| <b><u>ARQ</u></b>         | Gullone, Moore, Moss, & Boyd, 2000 | 22                     | “Having unprotected sex”                                                 | 0.76                    |

*Note.* UPPS = Urgency Premeditation Perseverance Sensation Seeking Scale; BSSS = Brief Sensation Seeking Scale; BAS = Behavioral Activation Scale; ARQ = Adolescent Risk Questionnaire.

PERSONALITY AND RISK-TAKING IN YOUNG ADULTS

Supplemental Table 2. *Factor Solution from the Principal Axis Factor Analysis of Adolescent Risk Questionnaire Items.*

| Items                                 | Factors     |                        |
|---------------------------------------|-------------|------------------------|
|                                       | Alcohol Use | Drug Use and Risky Sex |
| Smoking (tobacco)                     | -.015       | <b>.669</b>            |
| Roller blading                        | -.030       | -.170                  |
| Drinking and driving                  | -.010       | <b>.396</b>            |
| Parachuting                           | -.029       | .022                   |
| Speeding                              | .068        | .013                   |
| Stealing cars and going for joy rides | .007        | .038                   |
| Tae Kwon Do fighting                  | -.020       | -.170                  |
| Underage drinking                     | <b>.947</b> | -.030                  |
| Staying out late                      | <b>.560</b> | -.021                  |
| Driving without a license             | -.122       | .094                   |
| Talking to strangers                  | .091        | -.028                  |
| Flying in a plane                     | -.025       | .051                   |
| Cheating                              | -.009       | .136                   |
| Getting drunk                         | <b>.890</b> | .091                   |
| Sniffing gas or glue                  | .098        | -.074                  |
| Having unprotected sex                | .055        | <b>.324</b>            |
| Leaving school                        | -.083       | .208                   |
| Teasing and picking on people         | .006        | -.055                  |
| Snow skiing                           | .041        | .098                   |
| Taking drugs (including marijuana)    | .063        | <b>.809</b>            |
| Overeating                            | .085        | .036                   |
| Entering a competition                | -.011       | -.212                  |

PERSONALITY AND RISK-TAKING IN YOUNG ADULTS

Supplemental Table 3. *Descriptive Statistics for All Variables Comparing Males and Females.*

| Measures              | Males |      |      |       |           | Females |      |      |       |           | p-value |
|-----------------------|-------|------|------|-------|-----------|---------|------|------|-------|-----------|---------|
|                       | N     | Min  | Max  | Mean  | Std. Dev. | N       | Min  | Max  | Mean  | Std. Dev. |         |
| <b>Alcohol Use</b>    | 259   | 1.00 | 5.00 | 3.55  | 1.05      | 668     | 1.00 | 5.00 | 3.53  | 1.07      | 0.87    |
| <b>Drug &amp; Sex</b> | 259   | 1.00 | 4.25 | 1.70  | 0.72      | 668     | 1.00 | 4.25 | 1.51  | 0.60      | 0.00    |
| <b>Sports</b>         | 259   | 1.00 | 3.50 | 1.89  | 0.55      | 668     | 1.00 | 3.75 | 1.80  | 0.50      | 0.03    |
| <b>Compete</b>        | 259   | 1.00 | 5.00 | 3.35  | 1.10      | 668     | 1.00 | 5.00 | 3.17  | 1.02      | 0.03    |
| <b>Urgency</b>        | 259   | 1.00 | 4.27 | 2.63  | 0.65      | 667     | 1.17 | 4.75 | 2.79  | 0.63      | 0.00    |
| <b>Lack Premed</b>    | 259   | -    | -    | -2.69 | 0.53      | 667     | -    | -    | -2.67 | 0.56      | 0.64    |
| <b>Lack Persev</b>    | 259   | -    | -    | -2.60 | 0.56      | 667     | -    | -    | -2.64 | 0.58      | 0.40    |
|                       |       | 4.00 | 0.60 |       |           |         | 4.00 | 0.50 |       |           |         |
| <b>BAS Reward</b>     | 259   | 2.20 | 5.00 | 4.00  | 0.49      | 664     | 2.60 | 5.00 | 4.14  | 0.45      | 0.00    |
| <b>BAS Drive</b>      | 259   | 2.00 | 5.00 | 3.33  | 0.64      | 664     | 1.00 | 5.00 | 3.27  | 0.67      | 0.23    |
| <b>SS</b>             | 259   | 1.58 | 4.92 | 3.41  | 0.62      | 666     | 1.42 | 5.00 | 3.25  | 0.65      | 0.00    |
| <b>Discount</b>       | 258   | 0.00 | 9.00 | 4.79  | 2.05      | 663     | 0.00 | 9.00 | 4.45  | 1.88      | 0.02    |

*Note.* BAS = Behavioral Activation System; SS = Sensation Seeking; Premed = Premeditation; Persev = Perseverance.

PERSONALITY AND RISK-TAKING IN YOUNG ADULTS

Supplemental Table 4. *Correlations between Impulsivity-Related Traits and Risk Behaviors Split by Gender.*

|              | Alcohol Use | Drug & Sex  | Sports       | Competitions | Urgency     | Lack Premed  | Lack Persev  | BAS Reward   | BAS Drive    | SS          | Discounting |
|--------------|-------------|-------------|--------------|--------------|-------------|--------------|--------------|--------------|--------------|-------------|-------------|
| Alcohol Use  | 1           | <b>.484</b> | <b>.082</b>  | -.025        | <b>.140</b> | <b>.265</b>  | -.050        | <b>.139</b>  | <b>.300</b>  | <b>.393</b> | <b>.109</b> |
| Drug & Sex   | <b>.558</b> | 1           | -.056        | <b>-.105</b> | <b>.260</b> | <b>.298</b>  | <b>.105</b>  | .031         | <b>.174</b>  | <b>.346</b> | <b>.083</b> |
| Sports       | <b>.145</b> | .066        | 1            | <b>.142</b>  | .030        | <b>.115</b>  | .013         | .066         | .024         | <b>.238</b> | -.070       |
| Competitions | <b>.246</b> | .081        | <b>.239</b>  | 1            | -.047       | -.026        | <b>-.147</b> | <b>.175</b>  | <b>.169</b>  | <b>.110</b> | -.055       |
| Urgency      | .059        | <b>.248</b> | -.108        | -.018        | 1           | <b>.475</b>  | <b>.393</b>  | .025         | <b>.180</b>  | <b>.273</b> | <b>.091</b> |
| Lack Premed  | <b>.231</b> | <b>.331</b> | .021         | -.006        | <b>.484</b> | 1            | <b>.447</b>  | <b>-.165</b> | <b>.131</b>  | <b>.408</b> | <b>.176</b> |
| Lack Persev  | .018        | <b>.194</b> | -.017        | <b>-.185</b> | <b>.483</b> | <b>.470</b>  | 1            | <b>-.247</b> | <b>-.216</b> | <b>.106</b> | <b>.128</b> |
| BAS Reward   | .109        | -.063       | -.014        | <b>.183</b>  | -.058       | <b>-.250</b> | <b>-.249</b> | 1            | <b>.297</b>  | <b>.275</b> | -.067       |
| BAS Drive    | <b>.133</b> | <b>.149</b> | -.065        | <b>.171</b>  | <b>.143</b> | -.038        | <b>-.229</b> | <b>.327</b>  | 1            | <b>.379</b> | .024        |
| SS           | <b>.369</b> | <b>.398</b> | .116         | <b>.188</b>  | <b>.263</b> | <b>.336</b>  | <b>.147</b>  | <b>.337</b>  | <b>.371</b>  | 1           | .025        |
| Discounting  | .023        | .065        | <b>-.138</b> | -.075        | <b>.237</b> | .013         | .124         | .009         | -.031        | -.008       | 1           |

*Note.* Females are shown above the diagonal and males below. Correlations with  $p < .05$  uncorrected for multiple comparisons are shown in bold.

BAS = Behavioral Activation System; Premed = Premeditation; Persev = Perseverance; SS = Sensation Seeking.
